# Supplementary material for: Virulence Profiling, Multidrug Resistance and Molecular Mechanisms of Campylobacter Strains from Chicken Carcasses in Tunisia
Source: MDPI journal article supplement (doi:10.3390/antibiotics11070830), 2022-06-21
Supplement: s1 [file s1]

**Table S1.** PCR primers used in this study

| Species/antibiotics/<br>Virulence Factors                                          | Target<br>Gene                    | Primer Sequence (5'-3')                                                                                            | Reference |
|------------------------------------------------------------------------------------|-----------------------------------|--------------------------------------------------------------------------------------------------------------------|-----------|
| <b>Species Identification</b>                                                      |                                   |                                                                                                                    |           |
| <i>Campylobacter</i> spp.                                                          | <i>16S rRNA</i>                   | F : GGATGACACTTTTCGGAGC<br>R : CATTGTAGCACGTGTGTC                                                                  | [57]      |
| <i>C. jejuni</i>                                                                   | <i>mapA</i>                       | F : CTATTTTATTTTGTAGTGCTTGTC<br>R : GCTTTATTIGCCATTTGTTTTATTA                                                      | [58]      |
| <i>C. coli</i>                                                                     | <i>ceuE</i>                       | F: AATTGAAAAATTGCTCCAATATG<br>R: TGATTTTATTATTGTAGCAGCG                                                            | [58]      |
| <b>AMR determinents</b>                                                            |                                   |                                                                                                                    |           |
| Tetracycline                                                                       | <i>tet(O)</i>                     | F: GCGTTTTGTTTATGTGCG<br>R: ATGGACAACCCGACAGAAG                                                                    | [63]      |
|                                                                                    | <i>tet(A)</i>                     | F : GTGAAACCCAACATACCC<br>R : GAAGGCAAGCAGGATGTAG                                                                  | [25]      |
|                                                                                    | <i>tet(B)</i>                     | F : CCTTATCATGCCAGTCTTGC<br>R : ACTGCCGTTTTTTCGCC                                                                  | [25]      |
|                                                                                    | <i>tet(L)</i>                     | F: TGTGGCAACACATCGTCATTCTT<br>R : TTCTCATAGCTAACTTGTGGAACA                                                         | [37]      |
| MultidrugCmeABC<br>system                                                          | efflux<br><i>cmeB</i>             | F: AGGCGGTTTTGAAATGTATGTT<br>R: TGTGCCGCTGGGAAAAG                                                                  | [64]      |
| Ampicillin/Amoxicillin                                                             | <i>bla<sub>OXA-61</sub></i>       | F: AGAGTATAATACAAGCG<br>R: TAGTGAGTTGTCAAGCC                                                                       | [65]      |
| Gentamicin                                                                         | <i>aphA-3</i>                     | F: TGCCTAAAAGATACGGAAG<br>R: CAATCAGGCTTGATCCCC                                                                    | [65]      |
| Erythromycin                                                                       | <i>23S rRNA</i>                   | ERY2075: TAGTAAAGGTCCACGGGGTCGC<br>ERY2074: AGTAAAGGTCCACGGGGTCTGG                                                 | [60]      |
|                                                                                    | <i>ermB</i>                       | F:TGAAAAAGTACTCAACCAAAT<br>R:TCCTCCCCTTAAATAATAGAT                                                                 | [25]      |
| Ciprofloxacin /Nalidixicacid                                                       | <i>gyrA-Cj</i>                    | gyrA1: TTTTATAGCAAAGATTCTGAT<br>gyrA5: AAAGCATCATAAACTGCAA<br>gyrA4: CAAAGCATCATAAACTGCAG                          | [61]      |
| Ciprofloxacin /Nalidixicacid                                                       | <i>gyrA-Cc</i>                    | gyrA3: TATGAGCGTTATTATCGGTC<br>gyrA8: TAAGGCATCGTAAACAGCCA<br>gyrA4: GTCCATCTACAAGCTCGTTA                          | [62]      |
| <b>VirulenceFactors</b>                                                            |                                   |                                                                                                                    |           |
| FlaAprotein (motility)                                                             | <i>flaA</i>                       | F:AATAAAAAATGCTCATAAAAAACAGGTG<br>R :TACCGAACCAATGTCTGCTCTGATT                                                     | [66]      |
| CadF, outer membrane protein<br>(adhesion)                                         | <i>cadF</i>                       | F : TTGAAGGTAATTTAGATATG<br>R : CTAATACCTAAAGTTGAAAC                                                               | [67]      |
| Cytolethaldistendingtoxinsub<br>unit (CDT toxin production)                        | <i>cdtA</i>                       | F : CCTTGTGATGCAAGCAATC<br>R : ACACTCCATTGCTTTCTG                                                                  | [68]      |
| Cytolethaldistendingtoxinsub<br>unit B (CDT toxin production)                      | <i>cdtB</i>                       | F : CAGAAAGCAAATGGAGTGTT<br>R : AGCTAAAAGCGGTGGAGTAT                                                               | [69]      |
| Cytolethaldistendingtoxinsub<br>unit C (CDT toxin production)                      | <i>cdtC</i>                       | F : CGATGAGTTAAAACAAAAAGATA<br>R : TTGGCATTATAGAAAATACAGTT                                                         | [69]      |
| Type IV secretion system<br>(invasion)                                             | <i>virB11</i>                     | F : TCTTGTGAGTTGCCTTACCCCTTTT<br>R : CCTGCGTGTCTGTGTTATTTACCC                                                      | [69]      |
| *1,3- galactosyltransferases<br>involved in lipopolysaccharide<br>production (GBS) | <i>wlaN</i><br><i>CgtB</i>        | F : TTAAGAGCAAGATATGAAGGTG<br>R : CCATTTGAATTGATATTTTTG<br>F :TAAGAGCAAGATATGAAGGTG<br>R :GCACATAGAGAACGCTACAA     | [69]      |
| CeuE, lipoproteininvolved in<br>iron acquisition                                   | <i>ceuE- Cj</i><br><i>ceuE-Cc</i> | F :CCTGCTACGGTGAAAGTTTTGC<br>R :GATCTTTTTGTTTTGTGCTGC<br>F :ATGAAAAAATA TTTAGTTTTTGCA<br>R :ATTTTATTATTIG TAGCAGCG | [70]      |
